# Supplementary material
Source: MDPI journal article supplement (https://www.mdpi.com/2078-1547/14/3/35)
Supplement: s1 [file s1]

# Bitcoin's Carbon Footprint Revisited: Proof of Work Mining for Renewable Energy Expansion – Supporting Information

**Abstract:** This supporting information file contains grey literature and other media consulted for the article referenced in the title.

## 1. Introduction

In this section, grey literature is used to support the fact that some of the limited studies estimating Bitcoin's carbon footprint were not scientific articles (Coinshares 2022).

## 2. Background and Context

In this section, grey literature supports claims of slower cryptocurrency market penetration and even increased price volatility as a result of Bitcoin's public relations issues related to energy (Buckland and John 2021). It also supports indications of miners locating in parts of China, retrofitting of natural gas power plants are retrofitted for mining in the US and Canada (Coinshares 2022). It also supports the statement that there exists criticism against Bitcoin because it is argued to reduce green energy availability for other purposes (Amir 2021).

Notably, this section introduces a letter submitted to the White House Office of Science And Technology in response to a Request for Information, which casts significant doubt onto the reliance of Bitcoin on carbon-intensive energy sources (Paez and Cross 2022). One of the main sources about Bitcoin's energy consumption, the Cambridge Center for Alternative Finance, is used to support the fact that the China ban on Bitcoin has led to miners to move outside the United States (CCAF 2022). Grey literature is also used to illustrate the case of Kazakhstan (Batten 2023).

## 3. Bitcoin's Environmental Impact

Another response to the White House OSTP, by Global Digital Finance (GDF), is used to support the fact that Bitcoin's energy consumption and Scope 2 carbon intensity is undeniably high compared to systems like PoS (GDF 2022).

The highly-referenced site Digiconomist was consulted as the prime example of a "top-down" approach, estimating the share of miners' revenue spent on electricity (De Vries 2014). Similarly, a report by the Bitcoin Mining Council is used as a prime example of calculating the carbon intensity based on the grid mix corresponding to mining pools' IP addresses, or based on first-hand data from the miners (BMC 2022).

De Vries' index is consulted as a prime example of portraying Bitcoin's environmental impact in comparison to countries and as a share of global electricity consumption (Vries 2022). Industry reports are used to illustrate examples of comparing to industries instead (Coinshares 2022; Komando 2012; Navigant Consulting Inc 2008) and of using denominators of global CO<sub>2</sub> and GHG emissions (Coinshares 2022).

For Table 1, grey literature provided an example of considering the entire history of past transactions as secured with every new mining event, and not just the coinage of the latest coin (Imran 2018). De Vries' index is used as an example of an index used to imply that Bitcoin's throughput can only grow at the cost of more energy consumption (Vries 2022), and grey literature provided examples of criticism of this and of the focus on value delivered per kWh (Paez and Cross 2022; Imran 2018).

Troy Cross' milestone interview in What Bitcoin Did also provided an example of different carbon accounting schools, as it brought these debates into the public knowledge (WBD 2022).

**Citation:** Bitcoin's Carbon Footprint Revisited: Proof of Work Mining for Renewable Energy Expansion. *Challenges* 2023, 1, 0. <https://doi.org/>

Received: May 10, 2023

Revised: July 19, 2023

Accepted: July 19, 2023

Published:

**Copyright:** © 2023 by the authors. Submitted to *Challenges* for possible open access publication under the terms and conditions of the Creative Commons Attribution (CC BY) license (<https://creativecommons.org/licenses/by/4.0/>).

Paez and Cross' RFI response provided an example of the claim that mining emissions will peak at 1% of global emissions at worst (Paez and Cross 2022).

Grey literature supported the existence of debates on Bitcoin's e-waste (Paez and Cross 2022; Coinshares 2022; Saylor, Carter, and Feinstein 2022), noise pollution (Nguyen Anh Hoang and Säteri 2018; Voell 2022) and intrinsic value (Paez and Cross 2022; Coinshares 2022).

#### 4. Bitcoin Mining and RE

##### 4.1. Limitations of RE

Another RFI response supported an industry perspective that renewable energy sources face a challenge of intermittency (Soluna Computing 2022). Other grey literature supported descriptions of the duck curve and other imbalances in energy grids (Quirk and Stabinski 2021; Paez and Cross 2022; BCEI 2021).

In Table 2, industry reports and other grey literature also supported descriptions of the buildout of transmission lines as a way to balance electricity markets and their limitations (BCEI 2021; Coinshares 2022), of the need to subsidize capacity expansion (Quirk and Stabinski 2021; BCEI 2021), of the problems of curtailment (Paez and Cross 2022; Soluna Computing 2022), of usage of batteries to mitigate imbalances (BCEI 2021), and of power-to-X solutions (KCE 2016; BCEI 2021; Paez and Cross 2022). They also supported descriptions of technical and regulatory connection queues (BCEI 2021; Rand et al. 2021; Paez and Cross 2022).

##### 4.2. Distinctive Characteristics of PoW Mining

Industry sources also supported descriptions of the unique characteristics of Bitcoin mining (Rhodes, Deetjen, and Smith 2021; Paez and Cross 2022; BCEI 2021), including:

1. Extended time horizons (BCEI 2021; Paez and Cross 2022)
2. High interruptibility (Paez and Cross 2022; BCEI 2021) and its limitations (Freier and Ibañez 2023)
3. Bitcoin mining portability (BCEI 2021; Paez and Cross 2022; Quirk and Stabinski 2021; Imran 2018; Menati, Lee, and Xie 2022; Walton 2022; Cohn 2019; King 2022; Amir 2021)
4. Price sensitivity (Gronowska 2021; Paez and Cross 2022)
5. Scale agnosticity (Paez and Cross 2022)
6. Non-rival energy consumption (Soluna Computing 2022; Quirk and Stabinski 2021)
7. Waste heat reutilization (Nguyen Anh Hoang and Säteri 2018; Enachescu 2019; Paez and Cross 2022; Quirk and Stabinski 2021; Gronowska 2021)

##### 4.3. Applications

Industry reports and other grey literature was also instrumental in identifying applications of Bitcoin mining with hydroelectric power (BCEI 2021), with renewable energy (King 2022; Winton, Elmandjra, and Korus 2021; ARKInvest 2021), and with waste methane (Quirk and Stabinski 2021; Carter and Stevens 2021; WB 2022). Especially relevant is the claim of Coinshares (Coinshares 2022) that carbon emissions from flare mining are already negative and equivalent to 5% of Bitcoin's global positive emissions at present.

Industry literature also pointed to the problem of negative prices with nuclear energy (Howard and Galabov 2022) and to how competition in the Bitcoin mining sector may generate positive externalities (Imran 2018).

##### 4.4. Business Models

Industry sources pointed to business models with Bitcoin mining such as buyer of last resort (BCEI 2021), FTM and BTM mining (BCEI 2021; King 2022; Paez 2021), price-responsive mining (WB 2021). Troy Cross' milestone work on incentive offsets was also an important inspiration, as well as related industry sources (Cross and Bailey 2021; Coinshares 2022; WBD 2022; Johnson and Pingali 2021; Soluna Computing 2022; Ghaebi Panah et al. 2022).

## 5. Potential Impact of Mining

Numerous industry resources highlighted a possible positive effect of Bitcoin mining on renewable penetration and energy grid management (Cross and Bailey 2021; WBD 2022; Paez and Cross 2022; BCEI 2021). Certain statements stood out, such as the location of mining facilities near congested nodes (BCEI 2021; King 2022), increases in load flexibility (GCGET and Van de Graaf 2019; BCEI 2021; Paez and Cross 2022), Bitcoin as an “apex predator” of energy (Perrenod 2022) and as a tool to find a global market price for carbon (Imran 2018).

## 6. Challenging Trends

Industry sources were instrumental to highlighting the problem of unexpected hash rate increases (Sarkar 2022; Freier and Ibañez 2023; Frumkin 2021), supply chain disruptions (Perez 2022; Redman 2022; Frumkin 2021), the risk of regulatory intervention (Paez 2021; Coinshares 2022) and the problems with high marginal emissions (BCEI 2021; Dance 2023).

## 7. Challenger Technologies: Alternative Load Resources

Table 4 profited from industry sources highlighting how water desalination (BCEI 2021; Gasson 2020; L39 2022; Pearson 2018), green hydrogen and synthetic methane (BCEI 2021; Quirk and Stabinski 2021; Decker 2021; Liebreich 2020a; Liebreich 2022; Liebreich 2020b; Gupta 2021), CO<sub>2</sub> removal (BCEI 2021), batteries (BCEI 2021; Winton, Elmandjra, and Korus 2021; Frumkin 2021; ARKInvest 2021; Paez and Cross 2022), and other flexible data centers (Radovanovic 2020; Google 2018) compare against Bitcoin mining as a flexible load resource.

## 8. Empirical Support for Synergies between Bitcoin and RE

Some industry reports also provided information on specific cases of Bitcoin for remediation of ash landfills (Spence and Beard 2022)

## 9. Discussion and Critical Analysis

### 9.1. Intermittency, Profitability and Increasing Fierceness of Competition

Some grey literature had already highlighted the potential of Bitcoin to provide additional revenue to renewable energy producers (BCEI 2021), the trend of the mining market toward perfect competition (Cross and Bailey 2021; Perez 2022; McCook 2022; Öysti 2021; Braiins 2021).

### 9.2. Bitcoin's Potential: A Balanced Perspective

Industry sources had already highlighted the tendency of miners to go towards cheap energy sources. Notably, Imran (Imran 2018, p. 12) expects miners to act in an arbitrageur manner, first targeting “areas of energy surplus such as China, Canada, Norway [and] Iceland” and later moving into the renewable sector, looking for near-zero or even negative costs.

## 10. Limitations and Future Work

The point that regulatory interventions could drive miners driving miners to jurisdictions with fossil fuel subsidies, which could increase emissions had already been raised by CoinShares (Coinshares 2022, p. 18).

## 11. Conclusion

No grey literature was consulted in this section.

## References

- Amir, Nikita (June 2021). *Renewable energy can't cure Bitcoin's environmental woes*. URL: <https://www.popsci.com/technology/bitcoin-environmental-impact/>.
- ARKInvest (May 2021). *SolarBatteryBitcoin*. URL: <https://github.com/ARKInvest/SolarBatteryBitcoin>.
- Batten, Daniel (25 2023). *Leaving Kazakhstan, Bitcoin Mostly Green*. URL: <https://bitcoinmagazine.com/business/leaving-kazakhstan-bitcoin-mostly-green>.

- BCEI (2021). *Bitcoin is Key to an Abundant, Clean Energy Future*. Tech. rep. Bitcoin Clean Energy Initiative. URL: [https://assets.ctfassets.net/2d5q1td6cyxq/5mRjc9X5LTXFFihITt7QK/e7bcba47217b60423a01a357e036105e/BCEI\\_White\\_Paper.pdf](https://assets.ctfassets.net/2d5q1td6cyxq/5mRjc9X5LTXFFihITt7QK/e7bcba47217b60423a01a357e036105e/BCEI_White_Paper.pdf).
- BMC (July 2022). *Bitcoin mining electricity mix increased to 59.5% sustainable in Q2 2022*. URL: <https://bitcoinminingcouncil.com/bitcoin-mining-electricity-mix-increased-to-59-5-sustainable-in-q2-2022/>.
- Braiiins (July 2021). *Optimizations for Bitcoin Mining with Intermittent Energy Sources*. URL: <https://es.braiiins.com/blog/optimizations-bitcoin-mining-intermittent-energy>.
- Buckland, Kevin and Alun John (May 2021). *Bitcoin price tumbles, recoups after Elon Musk's U-turn on Tesla payments*. URL: <https://economictimes.indiatimes.com/tech/tech-bytes/bitcoin-price-tumbles-recoups-after-elon-musks-u-turn-on-tesla-payments/articleshow/82600107.cms>.
- Carter, Nic and Ross Stevens (2021). *Bitcoin Net Zero*. Tech. rep. NYDIG. URL: <https://nydig.com/bitcoin-net-zero>.
- CCAF (May 2022). *Bitcoin mining – an (un)surprising resurgence?* URL: <https://www.jbs.cam.ac.uk/insight/2022/bitcoin-mining-new-data-reveal-a-surprising-resurgence/>.
- Cohn, Lisa (July 2019). *Is Load Flexibility the New Demand Response?* URL: <https://www.microgridknowledge.com/distributed-energy/article/11429571/is-load-flexibility-the-new-demand-response>.
- Coinshares (2022). *The Bitcoin Mining Network - Energy and Carbon Impact*. Tech. rep. Coinshares. URL: <https://coinshares.com/research/bitcoin-mining-network-2022>.
- Cross, Troy and Andrew M. Bailey (2021). *Greening Bitcoin With Incentive Offsets*. URL: <https://www.resistance.money/green/>.
- Dance, Gabriel J. X. (Apr. 2023). *The Real-World Costs of the Digital Race for Bitcoin*. URL: <https://www.nytimes.com/2023/04/09/business/bitcoin-mining-electricity-pollution.html>.
- De Vries, Alex (July 2014). *Dogeconomist rebranding to Digiconomist*. URL: [https://digiconomist.net/dogeconomist\\_rebranding\\_to\\_digiconomist/](https://digiconomist.net/dogeconomist_rebranding_to_digiconomist/).
- Decker, Lisa A. (2021). "Bitcoin Mining and Innovations in the Oil Field." In: *Natural Resources & Environment* 36.2. ISSN: 23283408.
- Enachescu, Monika Silvia (Aug. 2019). "Closed Loop Cryptocurrency Mining in Alberta." PhD thesis. University of Calgary: Schulich School of Engineering. DOI: [10.11575/PRISM/37168](https://prism.ucalgary.ca/handle/1880/111108). URL: <https://prism.ucalgary.ca/handle/1880/111108>.
- Freier, Alexander and Juan Ignacio Ibañez (2023). "Bitcoin mining as a stabilizer for wind energy production: a case study in Germany." In: *Forthcoming*.
- Frumkin, Daniel (June 2021). *Economics of Bitcoin Mining with Solar Energy*. URL: <https://es.braiiins.com/blog/economics-bitcoin-mining-solar-energy>.
- Gasson, Christopher (Dec. 2020). *Will water beat Bitcoin in 2021?* URL: <https://www.globalwaterintel.com/news/2020/52/will-water-beat-bitcoin-in-2021>.
- GCGE and Thijs Van de Graaf (2019). *A new world : the geopolitics of the energy transformation*. Tech. rep. Global Commission on the Geopolitics of Energy Transformation. URL: <http://hdl.handle.net/1854/LU-8588274>.
- GDF (May 2022). *Re: OSTP, Request for Information on the Climate Implications of Digital Assets*. Tech. rep. Global Digital Finance.
- Ghaebi Panah, Payam et al. (Jan. 2022). "Investment opportunities: Hydrogen production or BTC mining?" In: *International Journal of Hydrogen Energy* 47.9, pp. 5733–5744. ISSN: 0360-3199. DOI: [10.1016/J.IJHYDENE.2021.11.206](https://doi.org/10.1016/j.ijhydene.2021.11.206).
- Google (Oct. 2018). *Moving toward 24x7 Carbon-Free Energy at Google Data Centers: Progress and Insights*. Tech. rep. URL: <https://www.gstatic.com/gumdrop/sustainability/24x7-carbon-free-energy-data-centers.pdf>.
- Gronowska, Magdalena (Feb. 2021). *Green Innovation in Bitcoin Mining: Recycling ASIC Heat*. URL: <https://es.braiiins.com/blog/green-innovation-in-bitcoin-mining-recycling-asic-heat>.
- Gupta, Anand (Sept. 2021). *Liebreich: 'Blue hydrogen will be needed because green H2 alone will not be able to meet demand'*. URL: <https://www.eqmagpro.com/liebreich-blue-hydrogen-will-be-needed-because-green-h2-alone-will-not-be-able-to-meet-demand-eq-mag-pro/>.

- Howard, Alan and Vladimir Galabov (Dec. 2022). *Nuclear-powered data centers are on the horizon*. URL: <https://omdia.tech.informa.com/OM027611/Nuclear-powered-data-centers-are-on-the-horizon>.
- Imran, Saad (Aug. 2018). *The positive externalities of bitcoin mining*. URL: [https://drive.google.com/file/d/1dB0aDo\\_\\_nzhNM8toHclhk9qfFNENVWci/view](https://drive.google.com/file/d/1dB0aDo__nzhNM8toHclhk9qfFNENVWci/view).
- Johnson, Marc and Sahithi Pingali (Dec. 2021). *Guidance for accounting and reporting electricity use and carbon emissions from cryptocurrency – Produced to advance the Crypto Climate Accord*. Tech. rep. URL: <https://cryptoclimate.org/wp-content/uploads/2021/12/RMI-CIP-CCA-Guidance-Documentation-Dec15.pdf>.
- KCE (2016). *Energy Storage Systems - The Contribution of Chemistry*. Tech. rep. Frankfurt am Main: Koordinierungskreis Chemische Energieforschung. URL: [https://dechema.de/dechema\\_media/Downloads/Positionspapiere/DBG\\_PP\\_Energiespeicher+2015\\_A4\\_engl.pdf](https://dechema.de/dechema_media/Downloads/Positionspapiere/DBG_PP_Energiespeicher+2015_A4_engl.pdf).
- King, Blake (Apr. 2022). *Bitcoin Mining & The Grid (Part 2): Transmission, Curtailment, and Behind-The-Meter*. URL: <https://es.braiiins.com/blog/bitcoin-mining-electric-grid-transmission-curtailment-behind-the-meter>.
- Komando, Kim (2012). *Vampire electronics cause higher electric bills*. URL: <https://eu.usatoday.com/story/tech/columnist/komando/2012/10/26/komando-electric-bills/1649195/>.
- L39 (May 2022). *How Bitcoin can unlock the energy of the ocean for a billion people*. URL: <https://bitcoinmagazine.com/business/bitcoin-unlocks-ocean-energy>.
- Liebreich, Michael (Oct. 2020a). *Liebreich: Separating Hype from Hydrogen*. URL: <https://about.bnef.com/blog/liebreich-separating-hype-from-hydrogen-part-two-the-demand-side/>.
- (Oct. 2020b). *Liebreich: Separating Hype from Hydrogen – Part One: The Supply Side*. URL: <https://about.bnef.com/blog/liebreich-separating-hype-from-hydrogen-part-one-the-supply-side/>.
- (Aug. 2022). *Green Hydrogen powering gas turbines: realistic strategy?* URL: <https://gasturbineworld.com/gas-turbines-burning-green-hydrogen/>.
- McCook, Hass (Jan. 2022). “Drivers of Bitcoin Energy Use and Emissions.” In: *Proceedings of The 3rd Workshop on Coordination of Decentralized Finance (CoDecFin) 2022*. URL: [https://www.academia.edu/78633293/Drivers\\_of\\_Bitcoin\\_Energy\\_Use\\_and\\_Emissions](https://www.academia.edu/78633293/Drivers_of_Bitcoin_Energy_Use_and_Emissions).
- Menati, Ali, Kiyeb Lee, and Le Xie (July 2022). “Modeling and Analysis of Utilizing Cryptocurrency Mining for Demand Flexibility in Electric Energy Systems: A Synthetic Texas Grid Case Study.” In: DOI: 10.48550/arxiv.2207.02428. URL: <https://arxiv.org/abs/2207.02428v2>.
- Navigant Consulting Inc (2008). “Energy Savings Estimates of Light Emitting Diodes in Niche Lighting Applications.” In: URL: [www.netl.doe.gov/ssl](http://www.netl.doe.gov/ssl).
- Nguyen Anh Hoang, Tri and Jorma Säteri (2018). “Reusing Waste Heat from Cryptocurrency Mining to Heat Multi-Family House.” PhD thesis. Metropolia University of Applied Sciences. URL: <http://www.theseus.fi/handle/10024/149939>.
- Öysti, Laura (2021). “Bitcoin and Energy Consumption.” PhD thesis. Aalto University. URL: [https://aaltodoc.aalto.fi/bitstream/handle/123456789/111699/master\\_%C3%96ysti\\_Laura\\_2021.pdf](https://aaltodoc.aalto.fi/bitstream/handle/123456789/111699/master_%C3%96ysti_Laura_2021.pdf).
- Paez, Margot (June 2021). *Policy Brief on New York Cryptocurrency Mining: From Moratorium to Task Force*. URL: <https://www.btcpolicy.org/articles/new-york-cryptocurrency-mining-from-moratorium-to-task-force>.
- Paez, Margot and Troy Cross (2022). *RFI Response: Climate Implications of Digital Assets – Bitcoin and the Energy Transition*. URL: [https://global-uploads.webflow.com/61d2416d1d63f07ecbfd010c627adf9af363491bd76e9449\\_BPI%20OSTP%20Comment.pdf](https://global-uploads.webflow.com/61d2416d1d63f07ecbfd010c627adf9af363491bd76e9449_BPI%20OSTP%20Comment.pdf).
- Pearson, Jordan (May 2018). *This Guy Heated Bath Water With Bitcoin Mining and It Worked Too Well*. URL: <https://www.vice.com/en/article/9k8ykp/heating-water-with-bitcoin-mining-asic-reddit>.
- Perez, Elena (Apr. 2022). *The race for semiconductors: Are crypto miners taking the lion’s share?* URL: <https://cointelegraph.com/news/the-race-for-semiconductors-are-crypto-miners-taking-the-lion-s-share>.
- Perrenod, Stephen (Sept. 2022). *Bitcoin as the Apex Predator*. URL: <https://medium.com/the-capital/bitcoin-as-the-apex-predator-36325dc460c1>.
- Quirk, David and Michael Stabinski (Oct. 2021). “Cryptocurrency Drives Data Center Innovation.” In: *ASHRAE Journal* 63.10, pp. 44–49. ISSN: 00012491. URL: <https://go.gale.com/ps/i.do>



- p=AONE&sw=w&issn=00012491&v=2.1&it=r&id=GALE%7CA689992157&sid=googleScholar&linkaccess=fulltext%20https://go.gale.com/ps/i.do?p=AONE&sw=w&issn=00012491&v=2.1&it=r&id=GALE%7CA689992157&sid=googleScholar&linkaccess=abs.
- Radovanovic, Ana (Apr. 2020). *Our data centers now work harder when the sun shines and wind blows*. URL: <https://blog.google/inside-google/infrastructure/data-centers-work-harder-sun-shines-wind-blows/>.
- Rand, Joseph et al. (2021). *Queued up: Characteristics of Power Plants Seeking Transmission Interconnection As of the End of 2020*. Tech. rep. Berkeley Lab - Lawrence Berkeley National Laboratory. URL: <https://emp.lbl.gov/publications/queued-characteristics-power-plants>.
- Redman, Jamie (Jan. 2022). *Global Chip Shortage Looms Over Bitcoin Mining Industry, ASIC Supply Tightens*. URL: <https://news.bitcoin.com/global-chip-shortage-looms-over-bitcoin-mining-industry-asic-supply-tightens/>.
- Rhodes, Joshua D, Thomas Deetjen, and Caitlin Smith (2021). "Impacts of Large, Flexible Data Center Operations on the Future of ERCOT." In.
- Sarkar, Arijit (Oct. 2022). *Top 3 reasons why Bitcoin hash rate continues to attain new all-time highs*. URL: <https://cointelegraph.com/news/top-3-reasons-why-bitcoin-hash-rate-continues-to-attain-new-all-time-highs>.
- Saylor, Michael, Nic Carter, and Darin Feinstein (2022). *Bitcoin Letter to the Environmental Protection Agency*.
- Soluna Computing (May 2022). *Re: RFI Response: Climate Implications of Digital Assets*. URL: [https://www.solunacomputing.com/wp-content/uploads/2022/07/Soluna\\_WH-RFI-response.pdf](https://www.solunacomputing.com/wp-content/uploads/2022/07/Soluna_WH-RFI-response.pdf).
- Spence, Bill and Greg Beard (Feb. 2022). *Bill Spence and Gregory Beard on the Real Story Behind Stronghold (EP.288)*. URL: <https://onthebrink-podcast.com/stronghold/>.
- Voell, Zack (June 2022). *We hear you: Bitcoin mining noise pollution is a solved problem*. URL: <https://bitcoinmagazine.com/business/solving-bitcoin-mining-noise-pollution>.
- Vries, Alex de (2022). *Bitcoin Energy Consumption Index*. URL: <https://digiconomist.net/bitcoin-energy-consumption>.
- Walton, Robert (Feb. 2022). *Bitcoin mining as a grid resource? 'It's complicated.'* URL: <https://www.utilitydive.com/news/bitcoin-mining-as-a-grid-resource-its-complicated/617896/>.
- WB (Oct. 2021). *Power Purchase Agreements (PPAs) and Energy Purchase Agreements (EPAs)*. URL: <https://ppp.worldbank.org/public-private-partnership/sector/energy/energy-power-agreements/power-purchase-agreements>.
- (July 2022). *Turning Garbage into Bitcoin with Adam Wright*. URL: <https://www.whatbitcoindid.com/wbd526-adam-wright>.
- WBD (Feb. 2022). *Can Bitcoin Mining Save the Environment? with Troy Cross*. URL: <https://www.whatbitcoindid.com/wbd463-troy-cross>.
- Winton, Brett, Yassine Elmandjra, and Sam Korus (Apr. 2021). *Solar + Battery + Bitcoin Mining. How Bitcoin mining could yield more reliable power*. URL: <https://wintonark.medium.com/bitcoin-mining-impact-on-renewable-uptake-fc91c5aa9be0>.
